# Supplementary material for: Robot and mechanical testing of a specialist manual toothbrush for cleaning efficacy and improved force control
Source: Research Square preprint supplement (doi:10.21203/rs.3.rs-1227668/v1), 2022-02-10
Supplement: Supplementary file 1 [file 5ecd6fd4b29f397969ad99e3.docx]

**Supplementary Material**

**Supplementary Figure 1.** Clinically validated ORMED brushing robot with replicated human teether and brushing force assessment

**
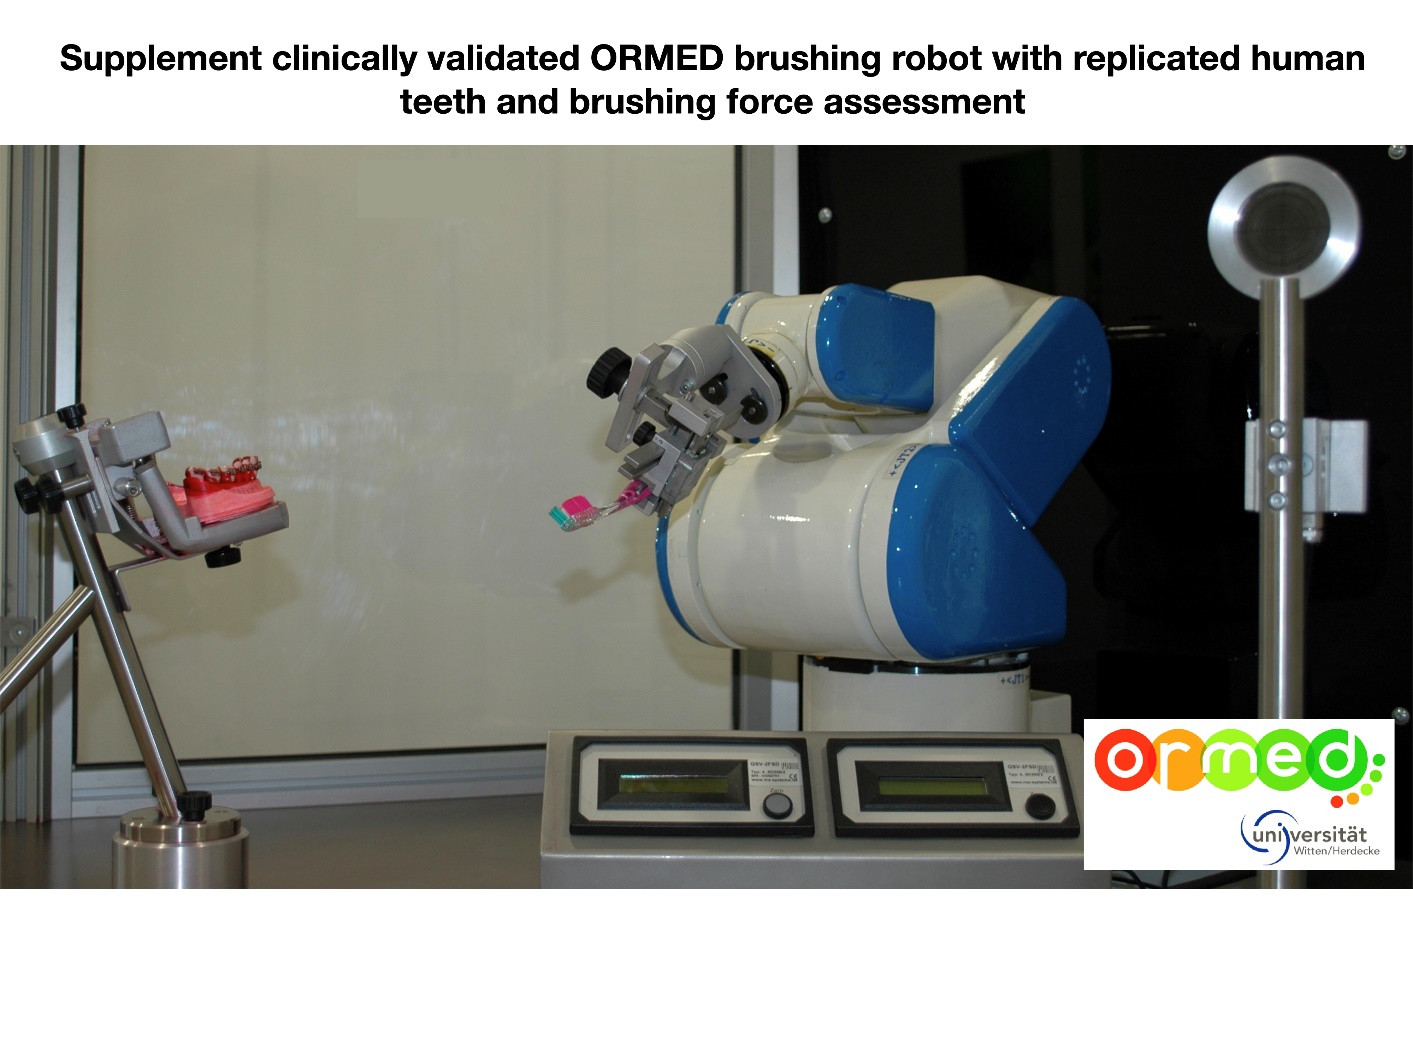
**

**Supplementary Figure 2.** Automated plaque planimetry index (APP-Index) tooth locations: A. left: APP index buccally (towards the cheek); right APP Index lingually (towards the tongue); B. APP index mesially (proximal in-between teeth, anterior side, right: APP-Index distally (proximal in-between teeth, posterior side)

**A.**

**
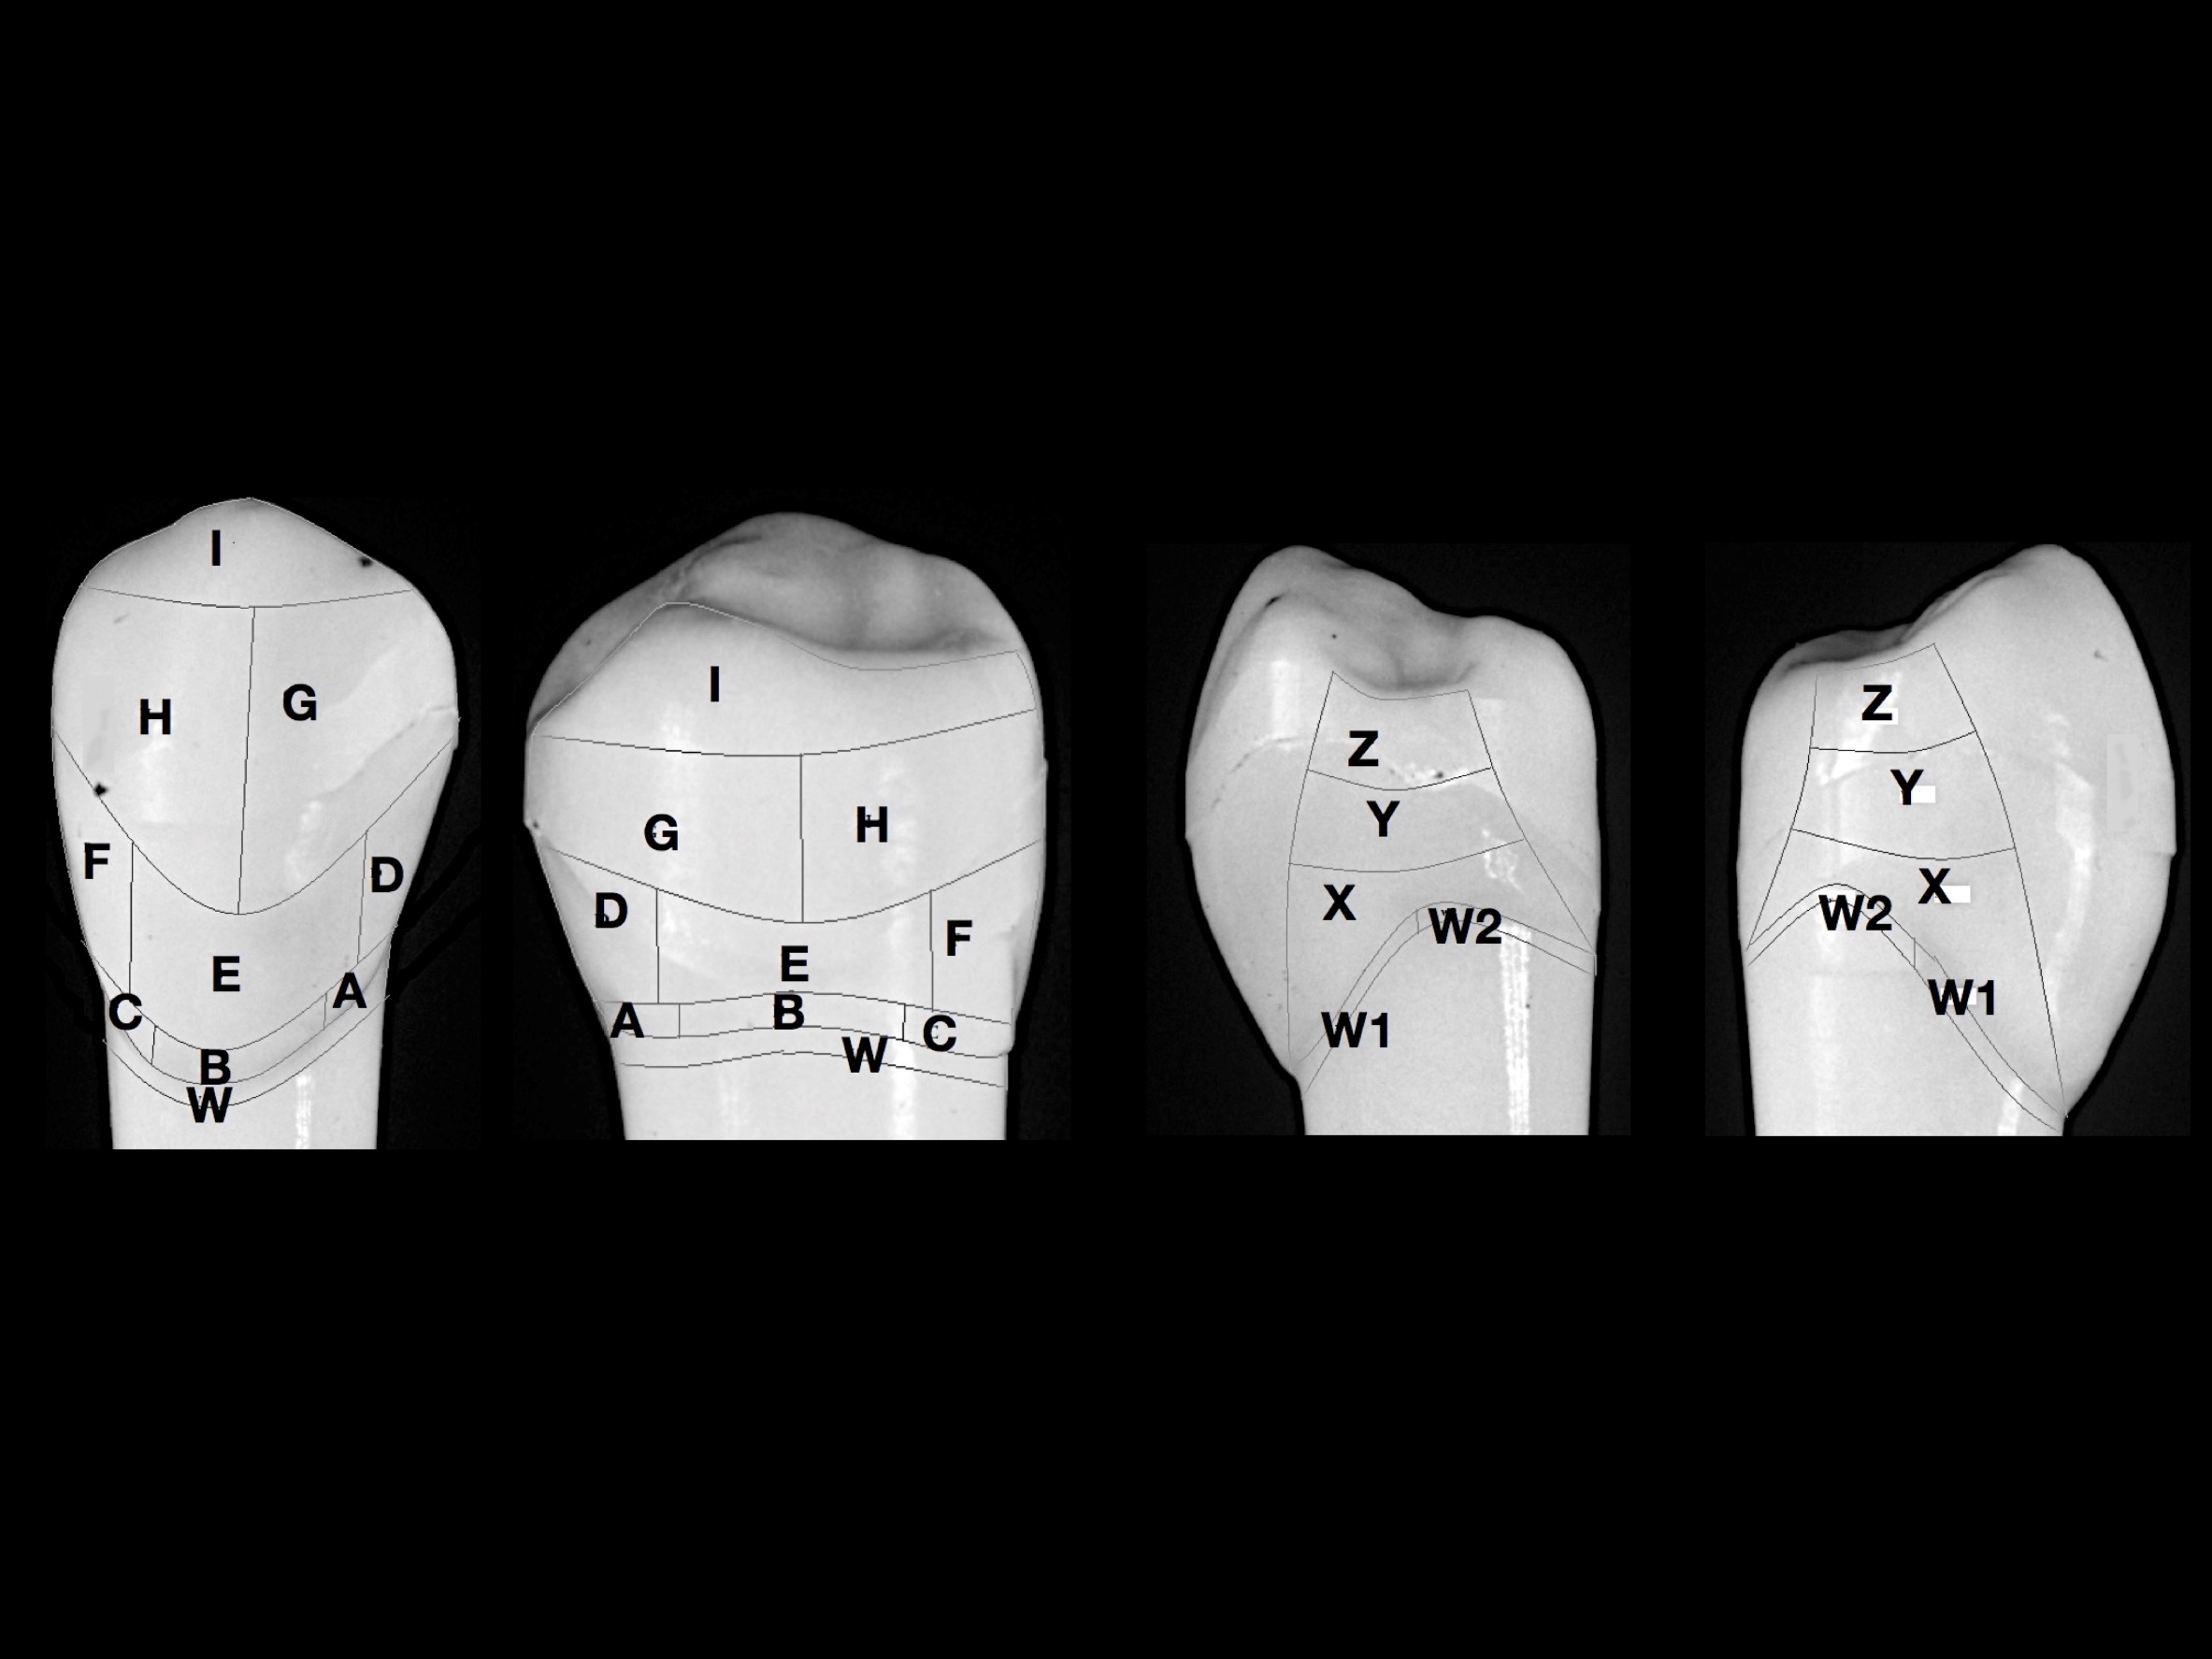
**

**B.**

**
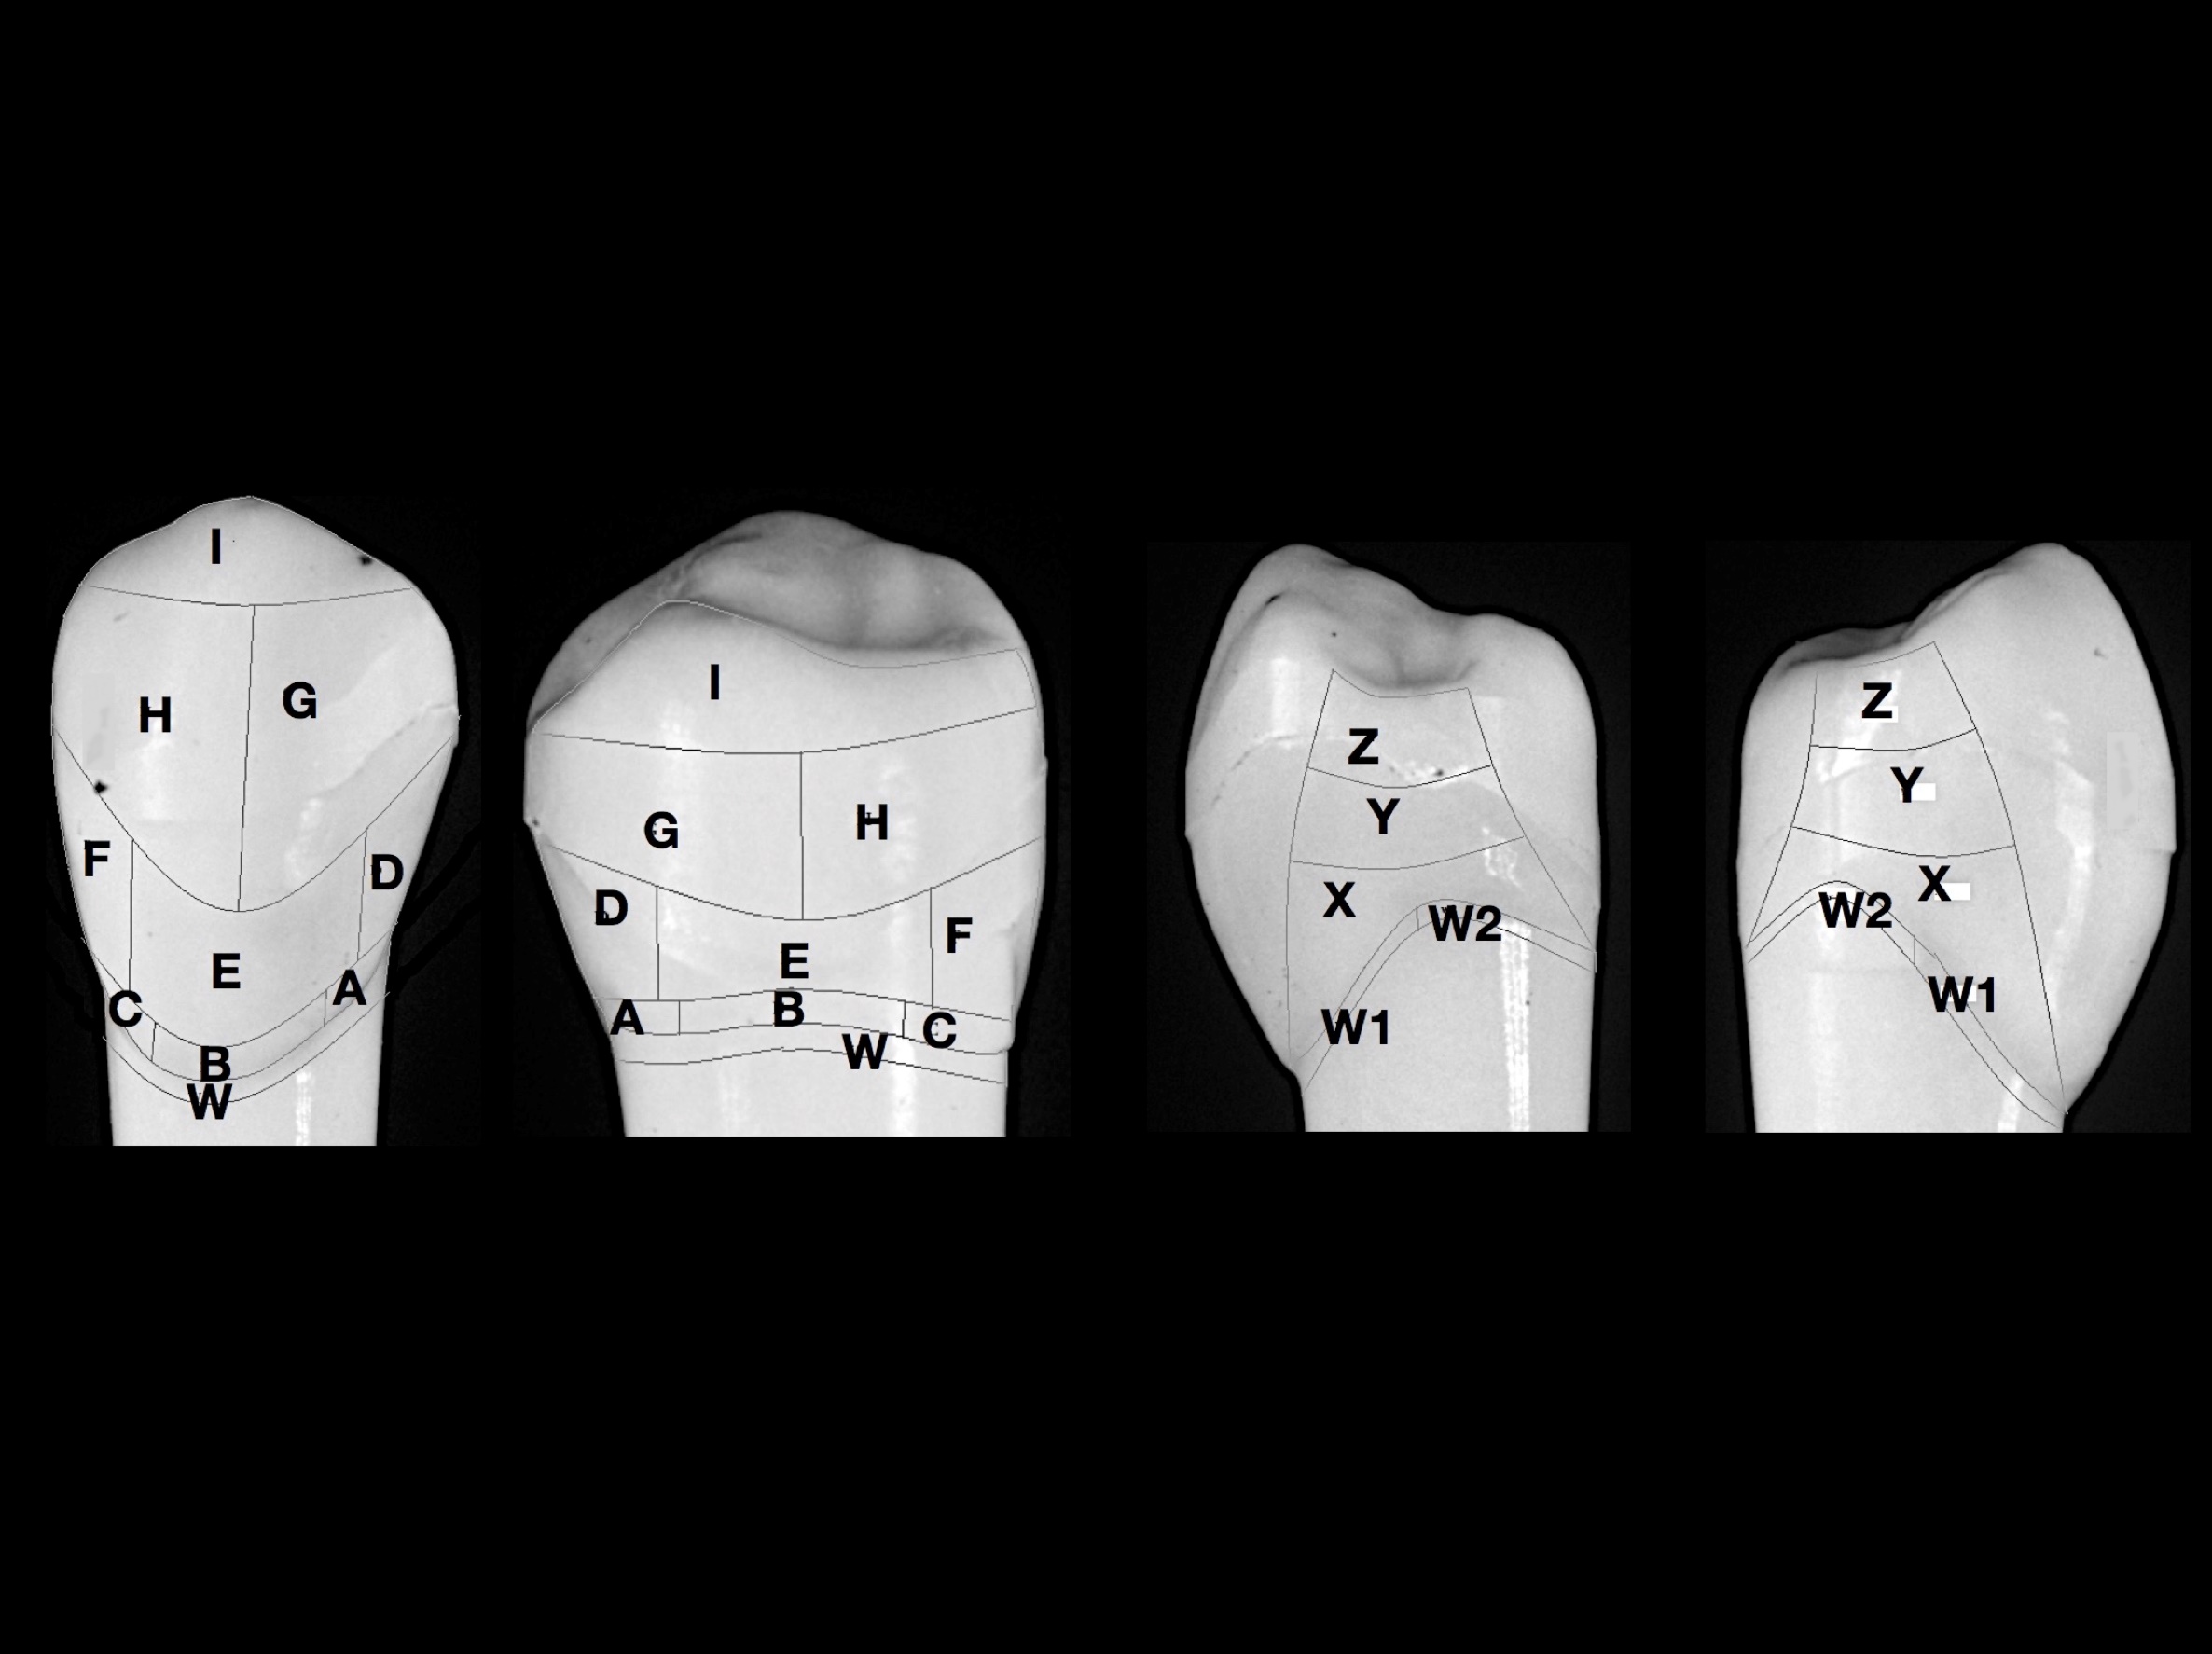
**

**Supplementary Figure 3.** Cleaning efficacy across root sites using A. horizontal, B. rotating and C. vertical brushing.

A.**
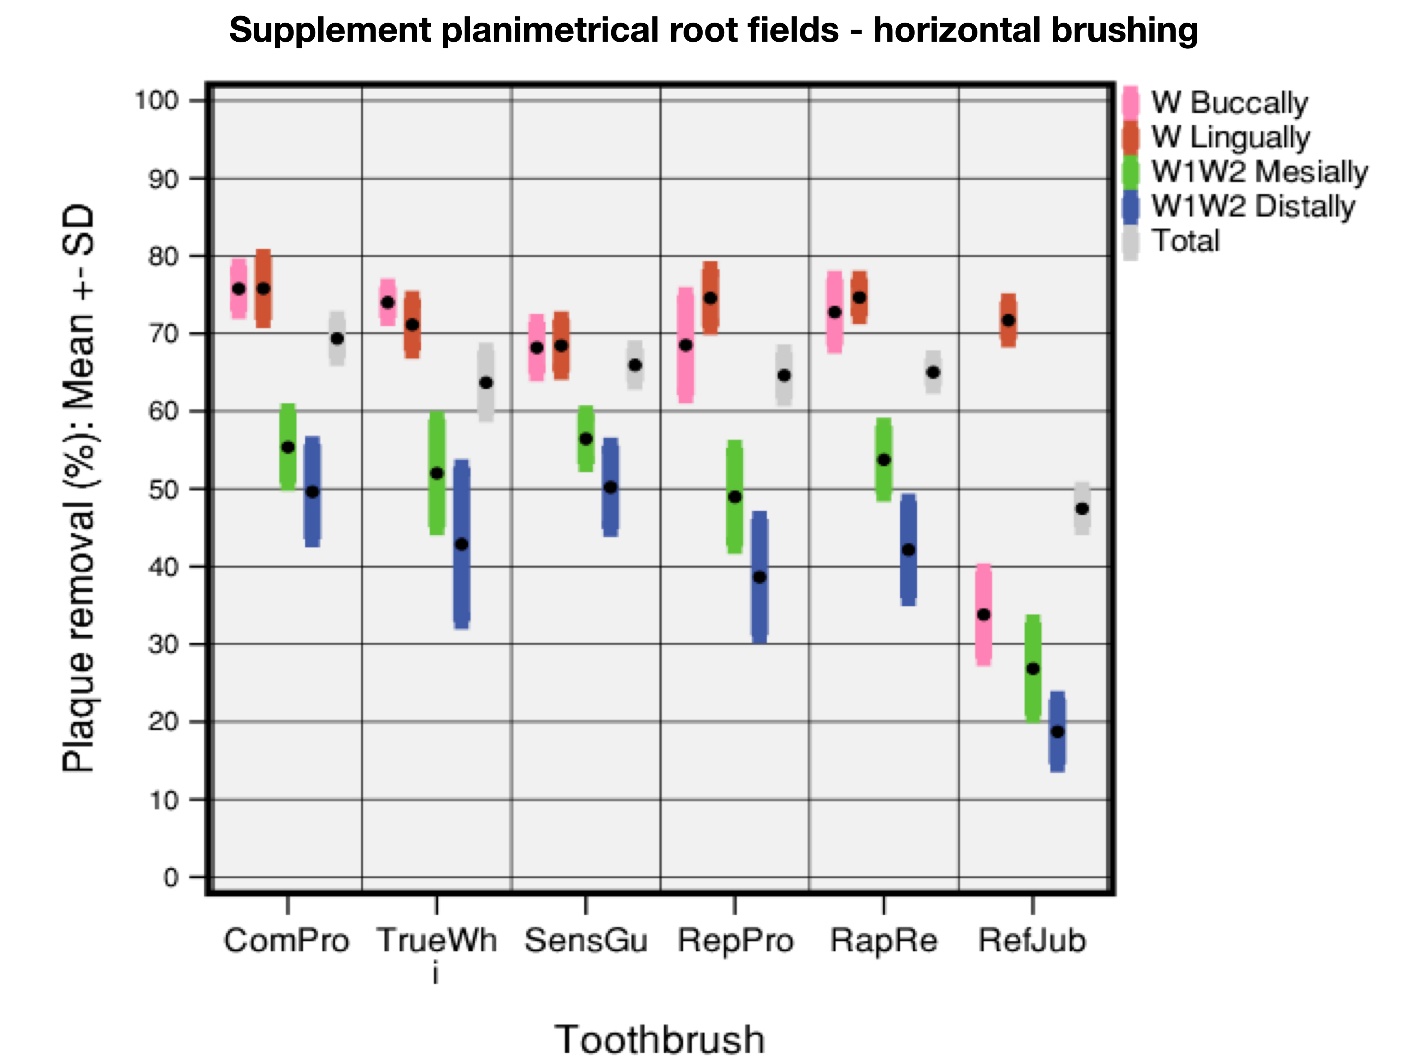
**

B.

**
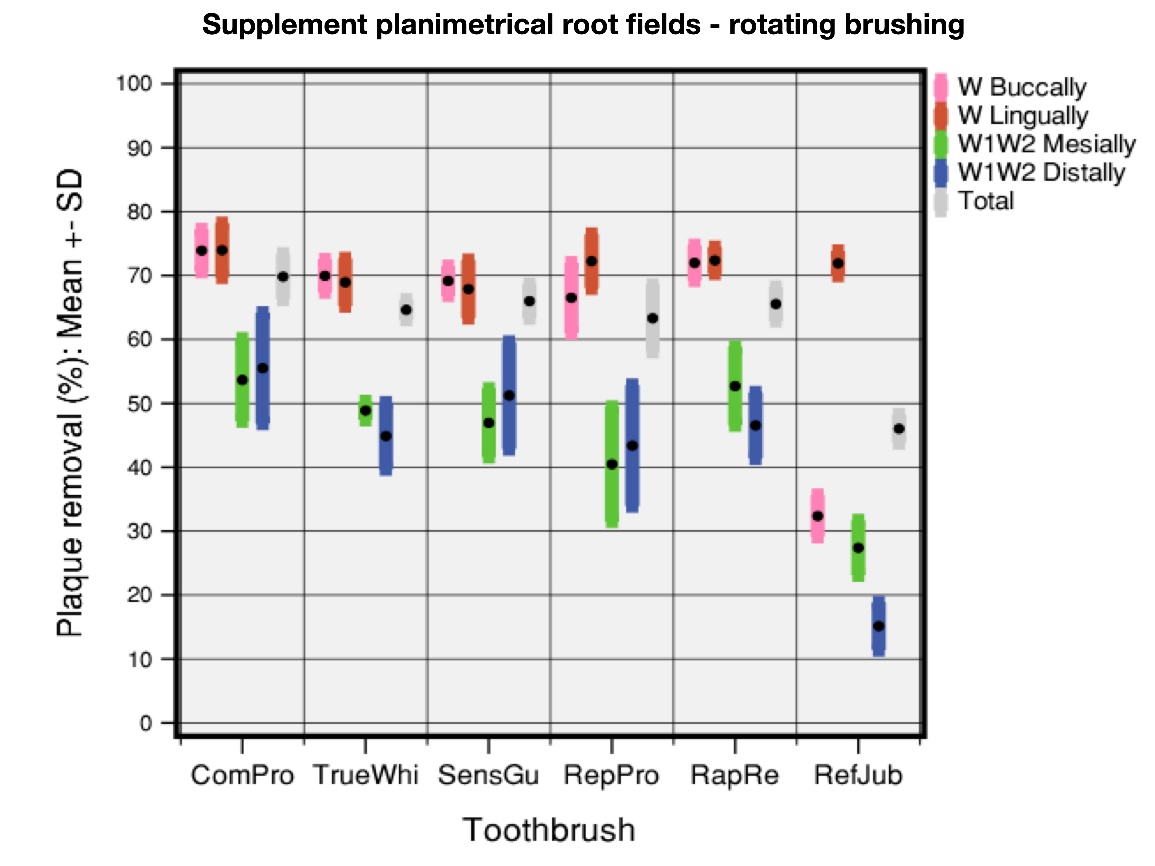
**

C.

**
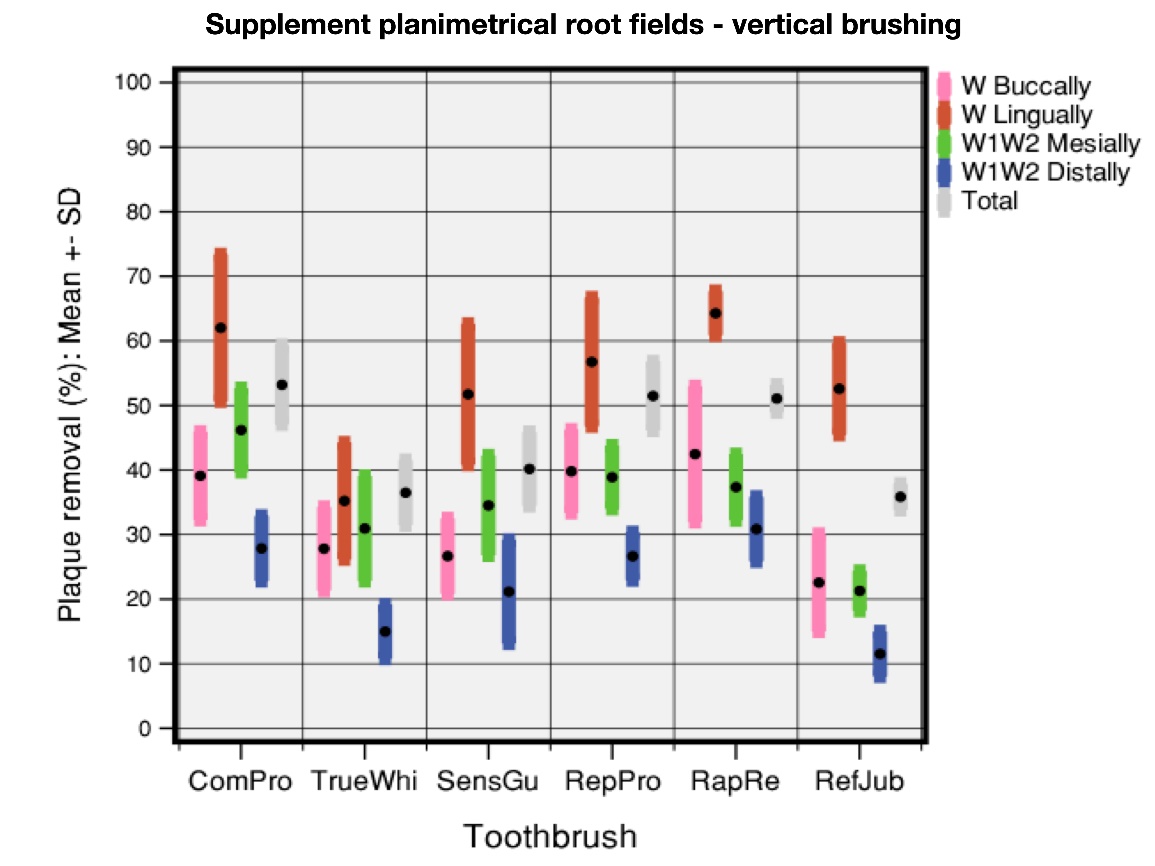
**

**Supplementary Table 1** Means (M)) and standard deviations (SD), medians (Med) and interquartile ranges (IQR; LL = lower limit, UL = upper limit) of cleaning efficacy parameters (5 plaque removal) for the tested toothbrushes **Horizontal brushing movement**

**Supplementary Table 1 (continued)** Means (M)) and standard deviations (SD), medians (Med) and interquartile ranges (IQR; LL = lower limit, UL = upper limit) of cleaning efficacy parameters (5 plaque removal) for the tested toothbrushes **Horizontal brushing movement**

**Supplementary Table 1 (continued)** Means (M)) and standard deviations (SD), medians (Med) and interquartile ranges (IQR; LL = lower limit, UL = upper limit) of cleaning efficacy parameters (5 plaque removal) for the tested toothbrushes **Horizontal brushing movement**

**Supplementary Table 2** Means (M)) and standard deviations (SD), medians (Med) and interquartile ranges (IQR; LL = lower limit, UL = upper limit) of cleaning efficacy parameters (5 plaque removal) for the tested toothbrushes - **Rotating brushing movement**

**Supplementary Table 2 (continued)** Means (M)) and standard deviations (SD), medians (Med) and interquartile ranges (IQR; LL = lower limit, UL = upper limit) of cleaning efficacy parameters (5 plaque removal) for the tested toothbrushes - **Rotating brushing movement**

**Supplementary Table 2 (continued)** Means (M)) and standard deviations (SD), medians (Med) and interquartile ranges (IQR; LL = lower limit, UL = upper limit) of cleaning efficacy parameters (5 plaque removal) for the tested toothbrushes - **Rotating brushing movement**

**Supplementary Table 3** (Means (M)) and standard deviations (SD), medians (Med) and interquartile ranges (IQR; LL = lower limit, UL = upper limit) of cleaning efficacy parameters (5 plaque removal) for the tested toothbrushes - **Vertical brushing movement**

**Supplementary Table 3 (continued)** (Means (M)) and standard deviations (SD), medians (Med) and interquartile ranges (IQR; LL = lower limit, UL = upper limit) of cleaning efficacy parameters (5 plaque removal) for the tested toothbrushes - **Vertical brushing movement**

**Supplementary Table 3 (continued)** (Means (M)) and standard deviations (SD), medians (Med) and interquartile ranges (IQR; LL = lower limit, UL = upper limit) of cleaning efficacy parameters (5 plaque removal) for the tested toothbrushes - **Vertical brushing movement**

**Supplementary Table 4** Mann-Whitney-Test of cleaning efficacy (%plaque removal): contrasts of six toothbrushes included in Study 2

**Supplementary Table 4 (continued)** Mann-Whitney-Test of cleaning efficacy (%plaque removal): contrasts of six toothbrushes included in Study 2 **- Horizontal brushing movement**

**Supplementary Table 4 (continued)** Mann-Whitney-Test of cleaning efficacy (%plaque removal): contrasts of six toothbrushes included in Study 2 **- Horizontal brushing movement**

**Supplementary Table 4 (continued)** Mann-Whitney-Test of cleaning efficacy (%plaque removal): contrasts of six toothbrushes included in Study 2 **- Horizontal brushing movement**

**Supplementary Table 4 (continued)** Mann-Whitney-Test of cleaning efficacy (%plaque removal): contrasts of six toothbrushes included in Study 2 **- Horizontal brushing movement**

U = test statistic of the Mann-Whitney-Test

Z = normalized test statistic of the Mann-Whitney-Test

p = significance value

*significant (p≤0.05)

**very significant (p≤0.01)

***highly significant (p≤0.001)

Yellow marking = not significant using Bonferroni correction

**Supplementary Table 5** Mann-Whitney-Test of cleaning efficacy (%plaque removal): contrasts of six toothbrushes included in Study 2 **- Rotating brushing movement**

**Supplementary Table 5 (continued).** Mann-Whitney-Test of cleaning efficacy (%plaque removal): contrasts of six toothbrushes included in Study 2 **- Rotating brushing movement**

**Supplementary Table 5 (continued).** Mann-Whitney-Test of cleaning efficacy (%plaque removal): contrasts of six toothbrushes included in Study 2 **- Rotating brushing movement**

**Supplementary Table 5 (continued).** Mann-Whitney-Test of cleaning efficacy (%plaque removal): contrasts of six toothbrushes included in Study 2 **- Rotating brushing movement**

**Supplementary Table 5 (continued).** Mann-Whitney-Test of cleaning efficacy (%plaque removal): contrasts of six toothbrushes included in Study 2 **- Rotating brushing movement**

U = test statistic of the Mann-Whitney-Test

Z = normalized test statistic of the Mann-Whitney-Test

p = significance value

*significant (p≤0.05)

**very significant (p≤0.01)

***highly significant (p≤0.001)

Yellow marking = not significant using Bonferroni correction

**Supplementary Table 6.** Mann-Whitney-Test of cleaning efficacy (%plaque removal): contrasts of six toothbrushes included in Study 2 **- Vertical brushing movement**

**Supplementary Table 6 (continued).** Mann-Whitney-Test of cleaning efficacy (%plaque removal): contrasts of six toothbrushes included in Study 2 **- Vertical brushing movement**

**Supplementary Table 6 (continued).** Mann-Whitney-Test of cleaning efficacy (%plaque removal): contrasts of six toothbrushes included in Study 2 **- Vertical brushing movement**

**Supplementary Table 6 (continued).** Mann-Whitney-Test of cleaning efficacy (%plaque removal): contrasts of six toothbrushes included in Study 2 **- Vertical brushing movement**

**Supplementary Table 6 (continued).** Mann-Whitney-Test of cleaning efficacy (%plaque removal): contrasts of six toothbrushes included in Study 2 **- Vertical brushing movement**

U = test statistic of the Mann-Whitney-Test

Z = normalized test statistic of the Mann-Whitney-Test

p = significance value

*significant (p≤0.05)

**very significant (p≤0.01)

***highly significant (p≤0.001)

Yellow marking = not significant using Bonferroni correction
